# Supplementary material for: Effects of the morphology of nanostructured ZnO and interface modification on the device configuration and charge transport of ZnO/polymer hybrid solar cells
Source: Royal Society of Chemistry journal article supplement (doi:10.1039/c3cp50266j), 2013-01-01
Supplement: c3cp50266j.pdf [file c3cp50266j.pdf]

## Supplementary Information

# **Effects of Morphology of Nanostructured ZnO and Interface Modification on Device Configuration and Charge Transport of ZnO/Polymer Hybrid Solar Cells**

*Pipat Ruankham, Susumu Yoshikawa, and Takashi Sagawa\**

*\* E-mail: sagawa.takashi.6n@kyoto-u.ac.jp, Tel: +81-75-753-5624*

**Contents**

|                                                      | <b>page</b> |
|------------------------------------------------------|-------------|
| <b>1. AFM image of ZnO nanoparticles thin film</b>   | <b>S3</b>   |
| <b>2. EDS point analysis</b>                         | <b>S2-3</b> |
| <b>3. Optimization of NR-length and NP-thickness</b> | <b>S5</b>   |
| <b>4. Electronic band structure</b>                  | <b>S6</b>   |
| <b>5. Reference</b>                                  | <b>S7</b>   |

1. AFM image of ZnO nanoparticles thin film

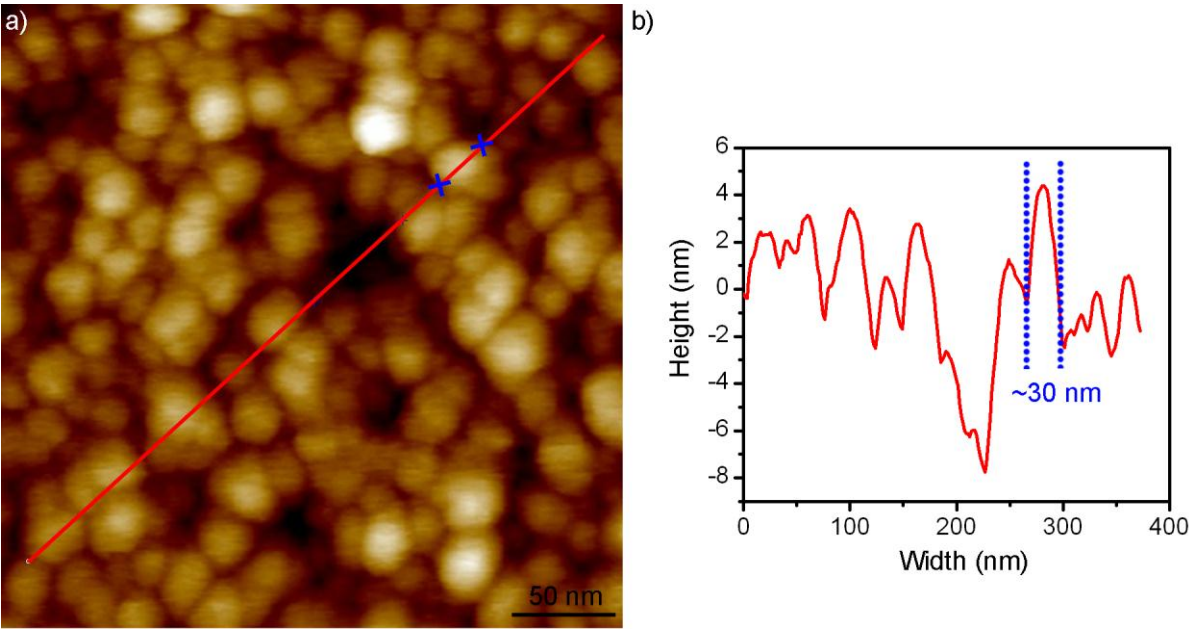

**Figure S1.** a) AFM image of ZnO nanoparticles thin film on an ITO substrate and b) cross section determined along the red line in the image.

2. EDS point analysis

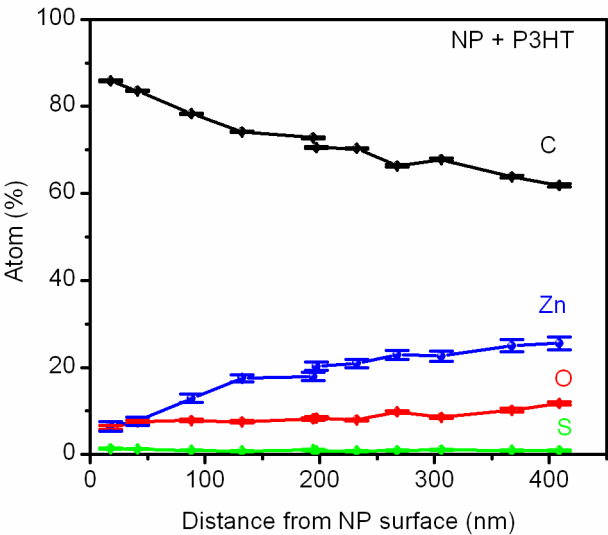

**Figure S2.** Relative atomic percentage of NPs coated with P3HT.

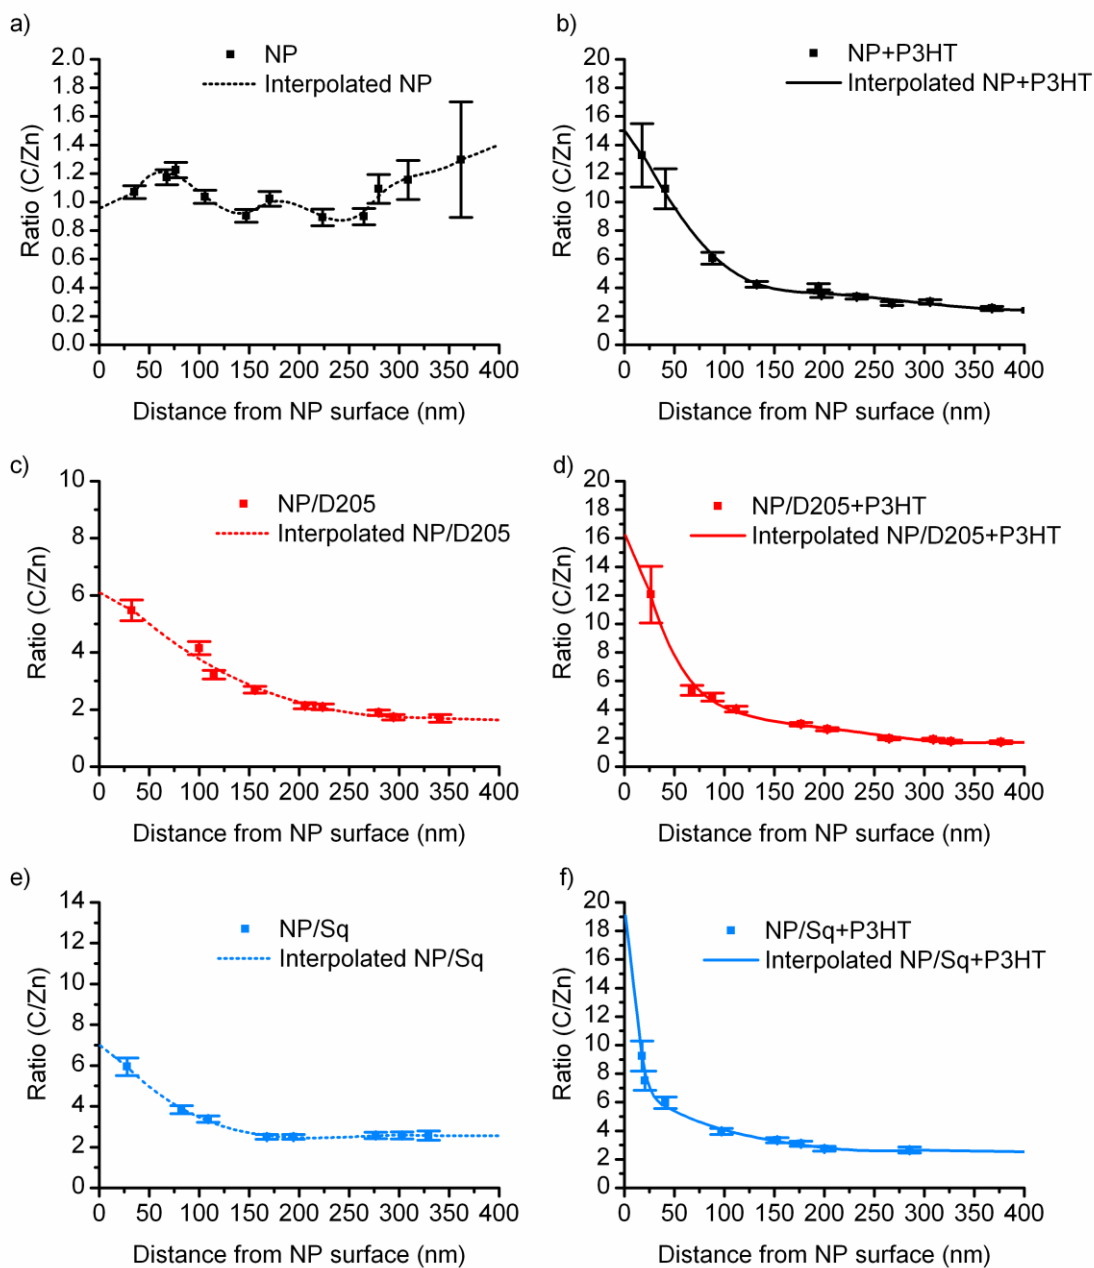

**Figure S3.** Experimental and interpolated C/Zn ratio of NPs with and without the surface modification before a), c), e) and after b), d), f) the P3HT deposition.

### 3. Optimization of NR-length and NP-thickness

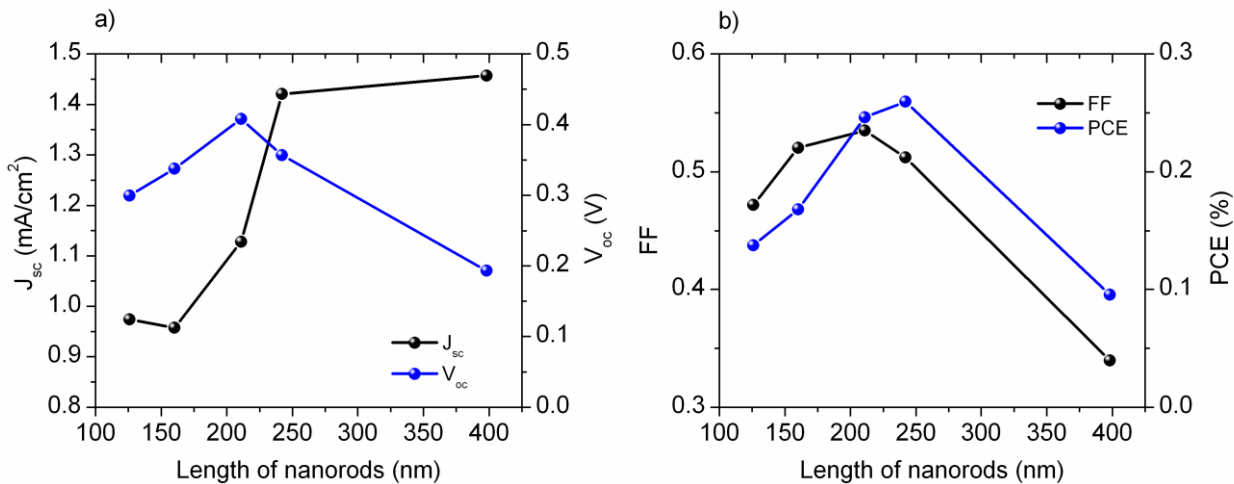

**Figure S4.** Photovoltaic parameters of a)  $J_{sc}$  and  $V_{oc}$ , b)  $FF$  and  $PCE$  for the ZnO NR devices without surface *modification* at various lengths of the nanorods.

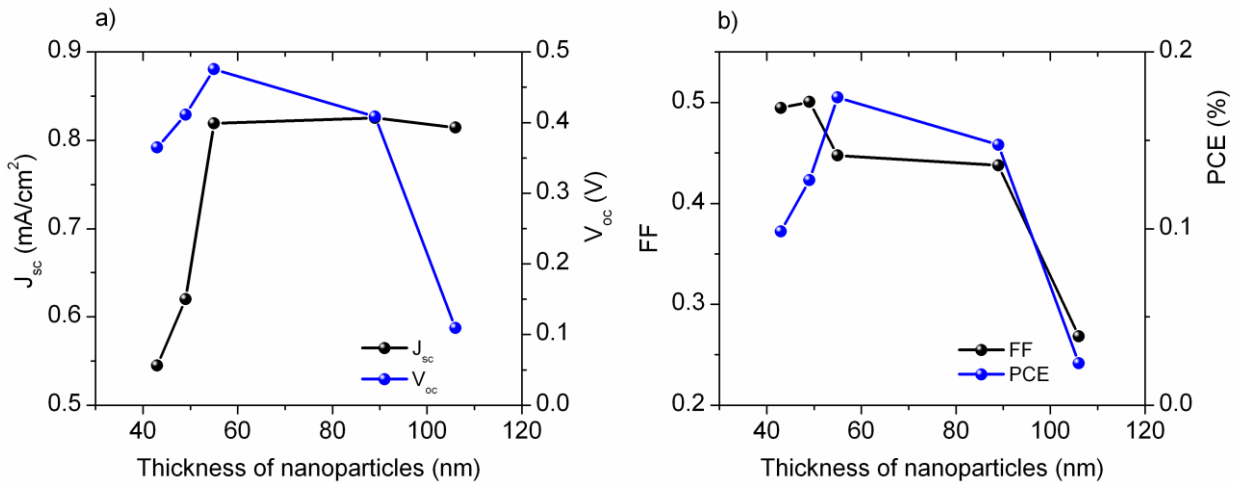

**Figure S5.** Photovoltaic parameters of a)  $J_{sc}$  and  $V_{oc}$ , b)  $FF$  and  $PCE$  for the ZnO NP devices without surface *modification* at various thicknesses of the nanoparticles.

4. Electronic band structure

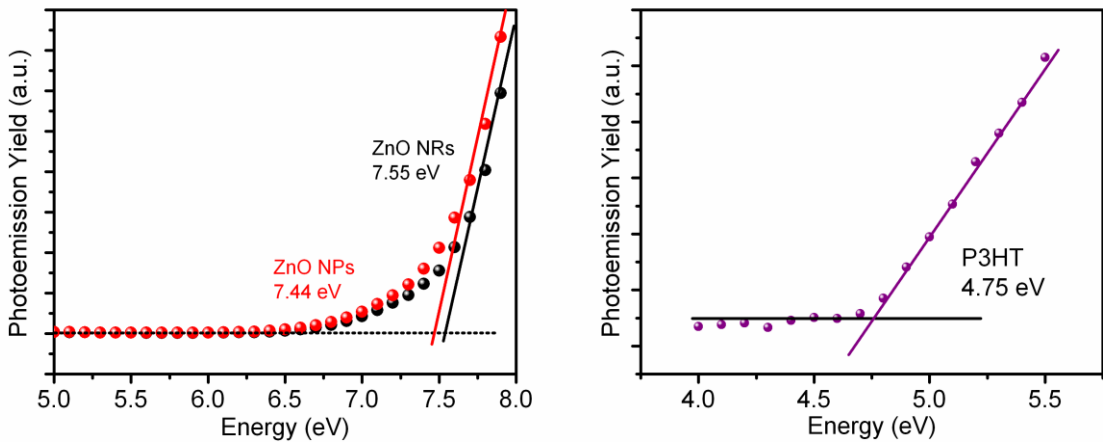

**Figure S6.** Valence band edge measurement of ZnO NRs, ZnO NPs, and P3HT by photoemission yield spectroscopy.

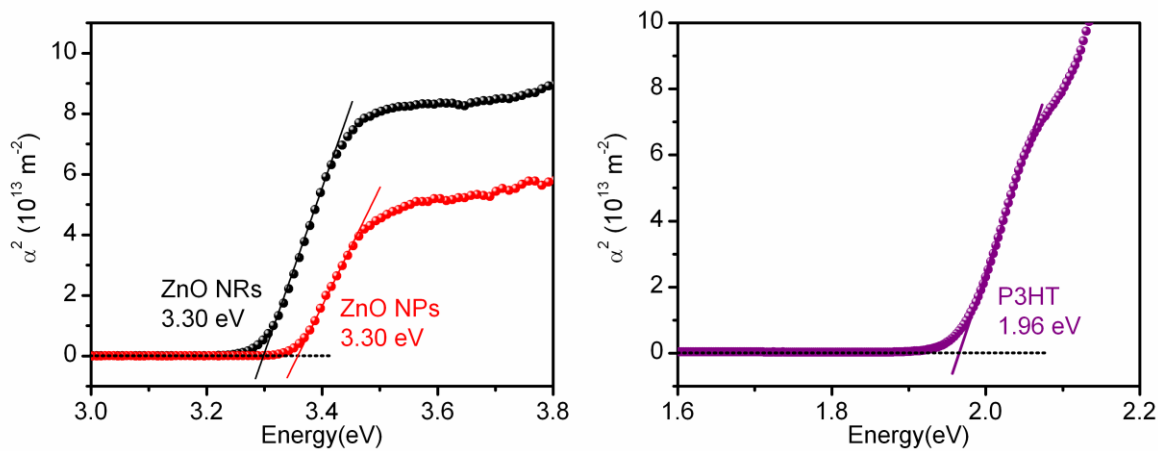

**Figure S7.** The plot of absorption coefficient ( $\sigma$ ) versus photon energy for ZnO NR, ZnO NP, and P3HT films on glass substrates. The open symbol and solid line denote the experimental data and fitted curve.<sup>1</sup>

## 5. Reference

- (1) Ruankham, P.; Sagawa, T.; Sakaguchi, H.; Yoshikawa, S. *J Mater Chem* **2011**, *21*, 9710.
